# Supplementary material for: A high sensitivity luminescent sensor for the stress biomarker cortisol using four-fold interpenetrated europium–organic frameworks integrated with logic gates
Source: Royal Society of Chemistry journal article supplement (doi:10.1039/d1tc01342d), 2021-01-01
Supplement: d1tc01342d1.pdf [file d1tc01342d1.pdf]

# **Electronic Supplementary Information**

## **High Sensitivity Luminescent Sensor for Cortisol of Stress Biomarker by Four-Fold Interpenetrated Europium-Organic Frameworks Integrated with Logic Gate**

Meng-Hua Tang, Ying Shi, Xiao-Lei Jiang, Hang Xu\*, Yue Ma, and Bin Zhao\*

Department of Chemistry, Key Laboratory of Advanced Energy Material Chemistry, MOE Nankai University, Tianjin 300071, China

\*E-mail: xuhang@mail.nankai.edu.cn; zhaobin@nankai.edu.cn

## X-Ray crystallography

Suitable crystals **MHT-1** was paced in a cooled N<sub>2</sub> gas stream at ~120 K for crystallographic data collection on a SuperNova Single Crystal Diffractometer equipped with graphite-monochromatic Mo-K $\alpha$  radiation ( $\lambda = 0.71073 \text{ \AA}$ ). Data reduction included absorption was performed by using the SAINT program. The structures were solved by direct methods and refined by full-matrix least squares on F<sup>2</sup> with SHELXS-97 and SHELXL-97 programs. All the hydrogen atoms were placed geometrically and refined using a riding model.

We used PLATON/SQUEEZE to calculate the contribution to the diffraction from the solvent region. The number of isolated H<sub>2</sub>O and DMA molecules was determined by TG analyses and elemental microanalyses. Detailed crystal data and structure refinement for **MHT-1** was shown in **Table S1**.

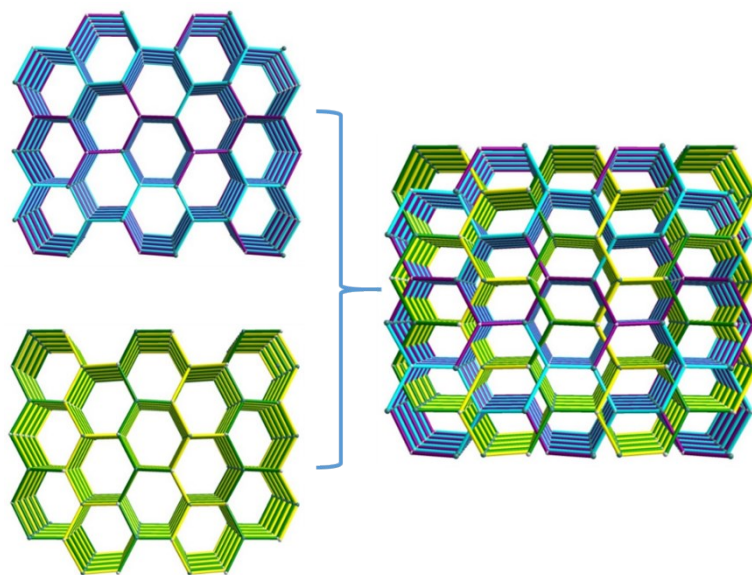

**Fig. S1.** The simplified topology of **MHT-1** with a [2+2] mode.

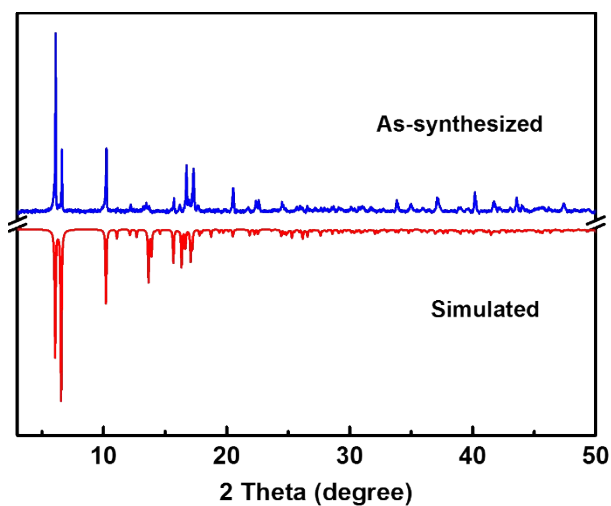

**Fig. S2.** The PXRD patterns of as-synthesized **MHT-1** and simulated one based on single-crystal data.

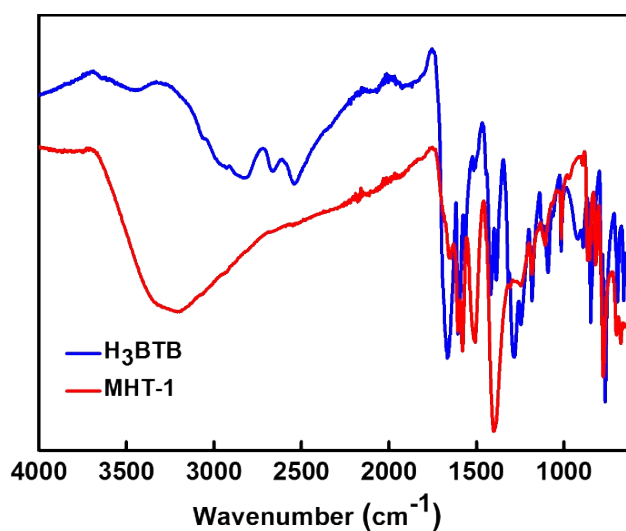

**Fig. S3.** The FT-IR spectra of  $H_3BTB$  ligand and **MHT-1**.

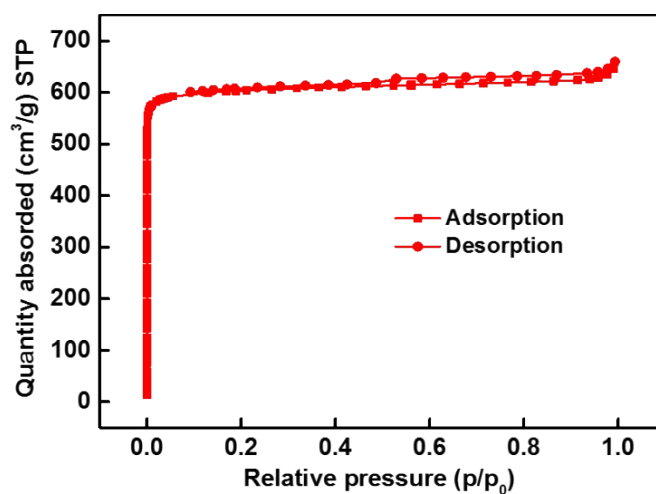

**Fig. S4.**  $N_2$  adsorption-desorption isotherm of **MHT-1**.

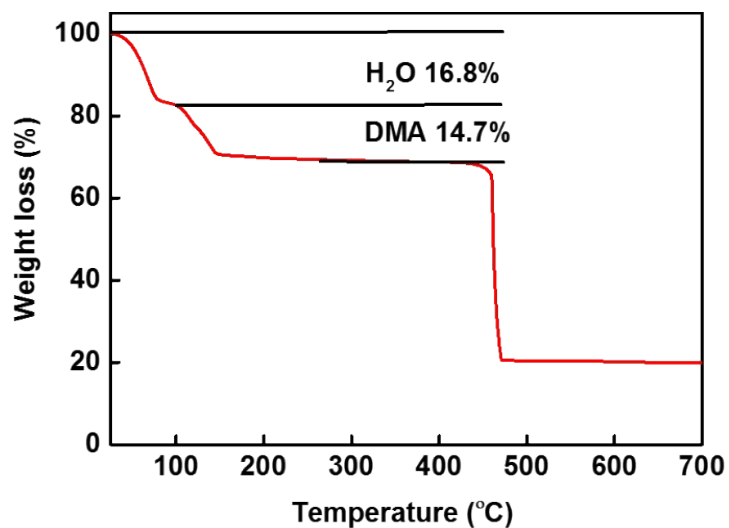

Fig. S5. TGA curve of MHT-1.

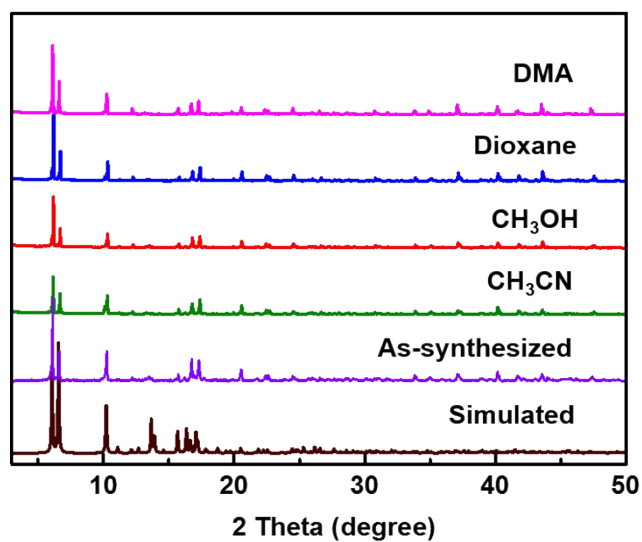

Fig. S6. The PXRD patterns of MHT-1 after immersing in common organic solvents.

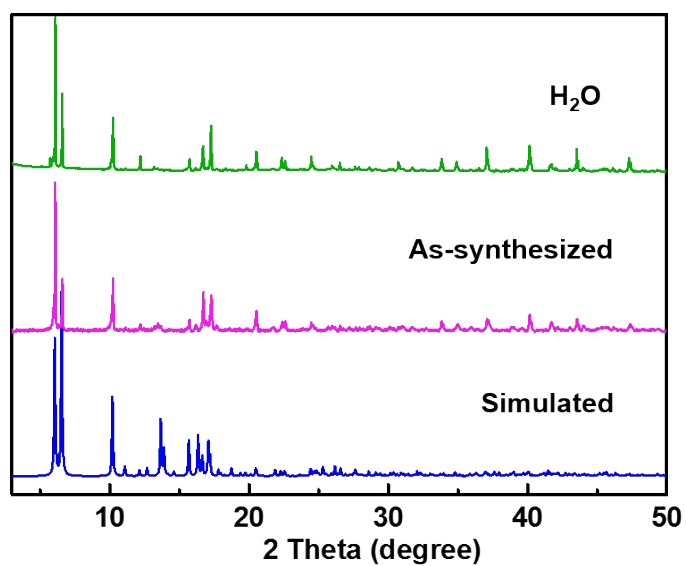

Fig. S7. The PXRD patterns of MHT-1 after soaking in water for 12 h.

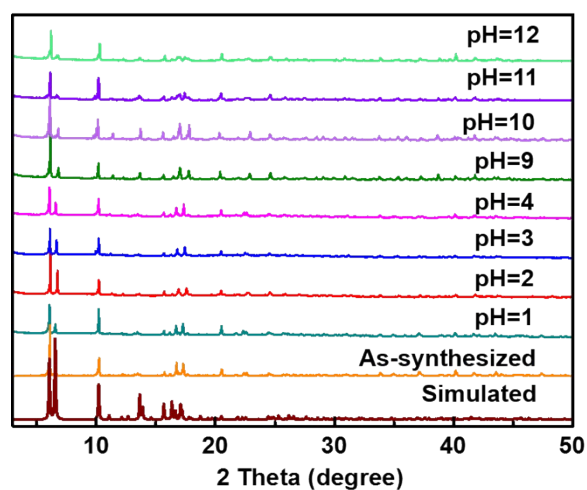

**Fig. S8.** The PXRD patterns of **MHT-1** treated by aqueous solutions with pH ranging from 1 to 12.

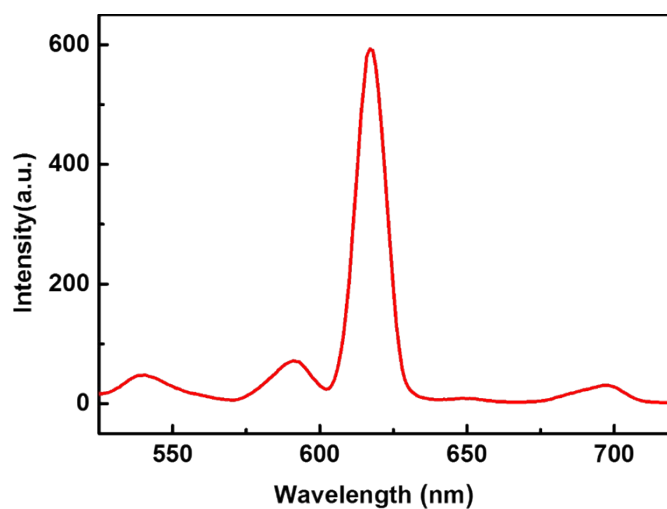

**Fig. S9.** The luminescence emission spectrum of **MHT-1**.

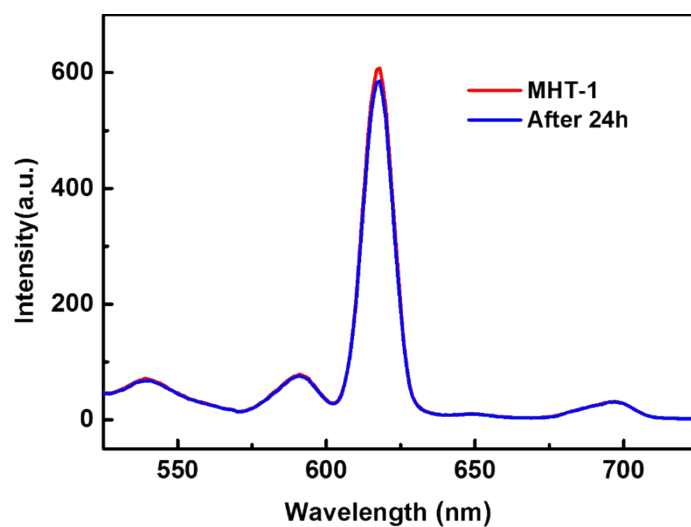

**Fig. S10.** Luminescence spectra of **MHT-1** original and after immersed in water for 24 hours.

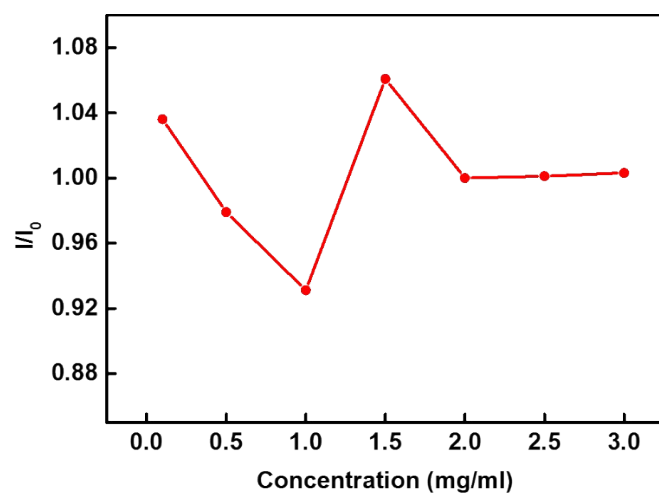

**Fig. S11.** The relationship between relative luminescent intensity of **MHT-1** and cortisol concentration.

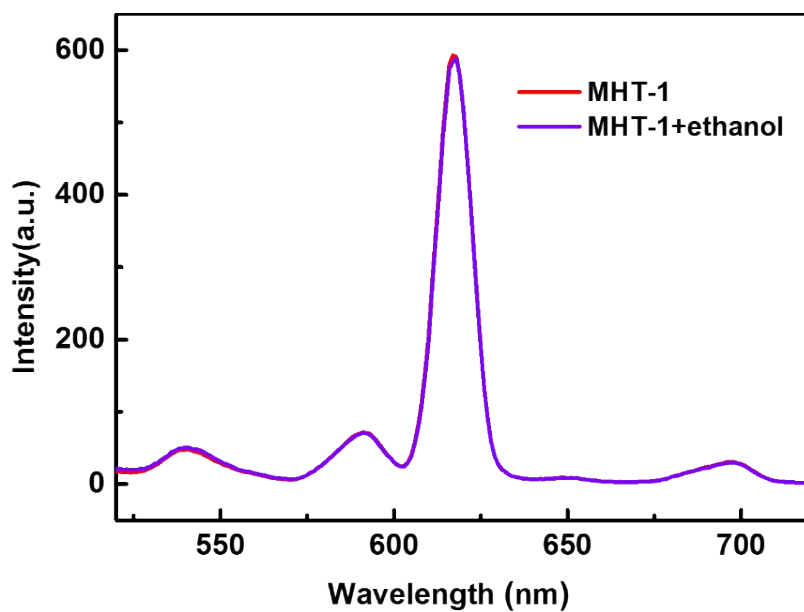

**Fig. S12.** Luminescence spectra of **MHT-1** and when ethanol was added.

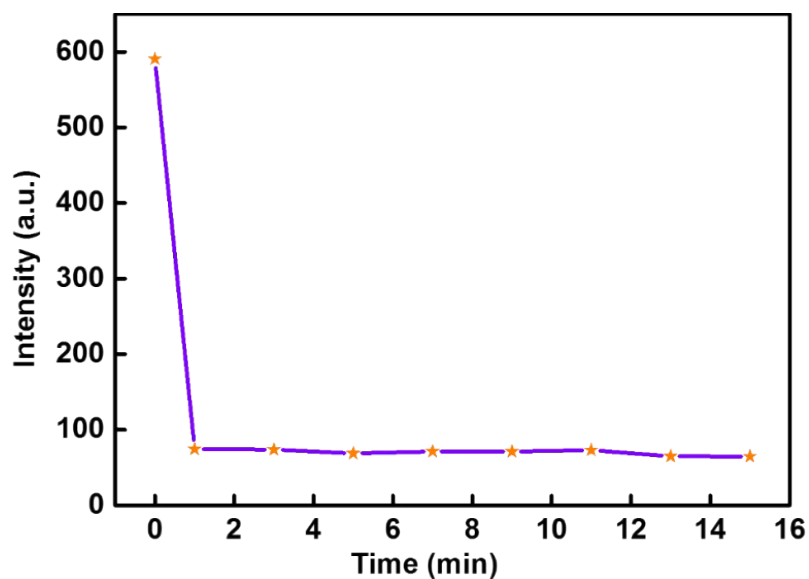

**Fig. S13.** Time-dependent luminescence intensity of **MHT-1** after the addition of cortisol.

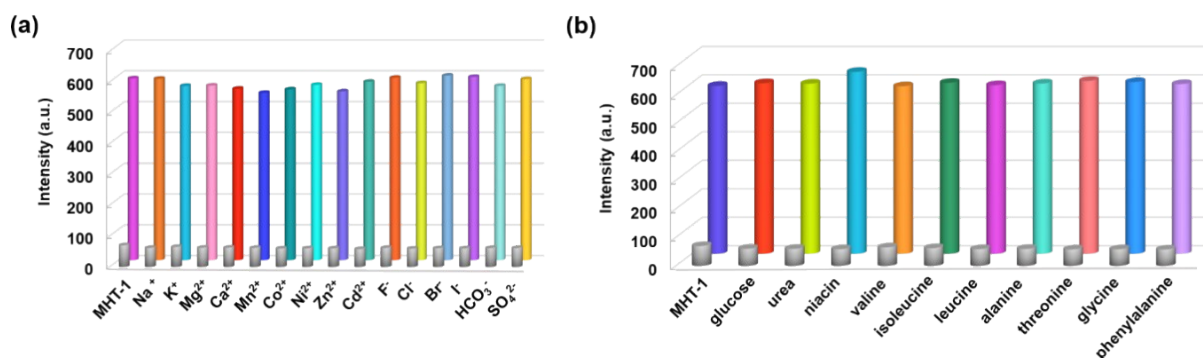

**Fig. S14.** Changes of luminescence intensity at 617 nm when cortisol was added into **MHT-1** solutions in the presence of (a) organic molecules, amino acids and (b) various kinds of cations and anions.

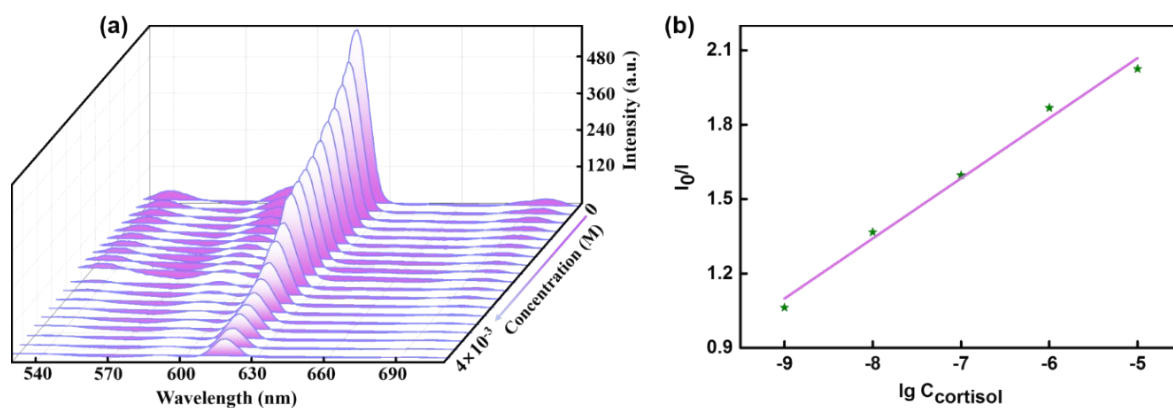

**Fig. S15.** (a) Luminescent response of **MHT-1** to cortisol in artificial sweat with cortisol concentration ranging from  $10^{-9}$  M to  $4 \times 10^{-3}$  M. (b) Linear fitting in the low concentration range.

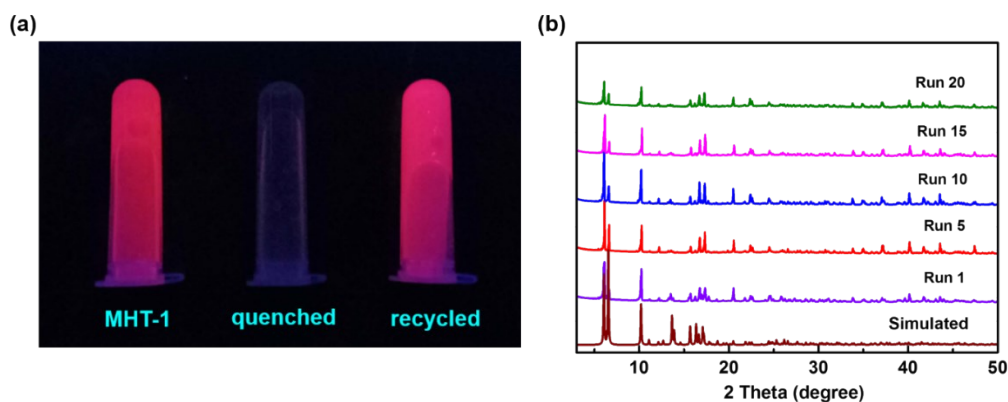

**Fig. S16.** (a) The luminescence change of **MHT-1** after quenching and recycling (irradiated by a 254 nm UV lamp). (b) PXRD of **MHT-1** after detecting cortisol 20 times.

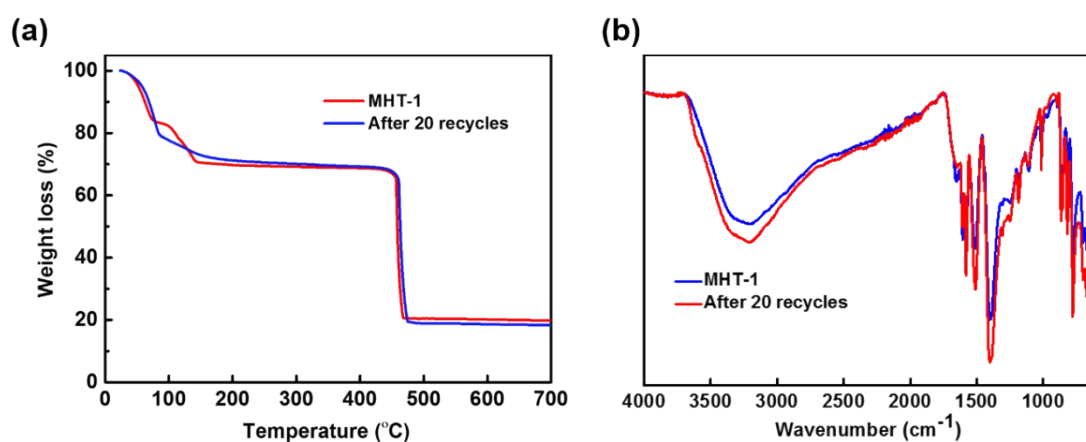

**Fig. S17.** (a) Thermogravimetric analyses of **MHT-1** and after 20 recycles, respectively. (b) The comparison of infrared spectroscopy between **MHT-1** and after



20 recycles of cortisol detection.

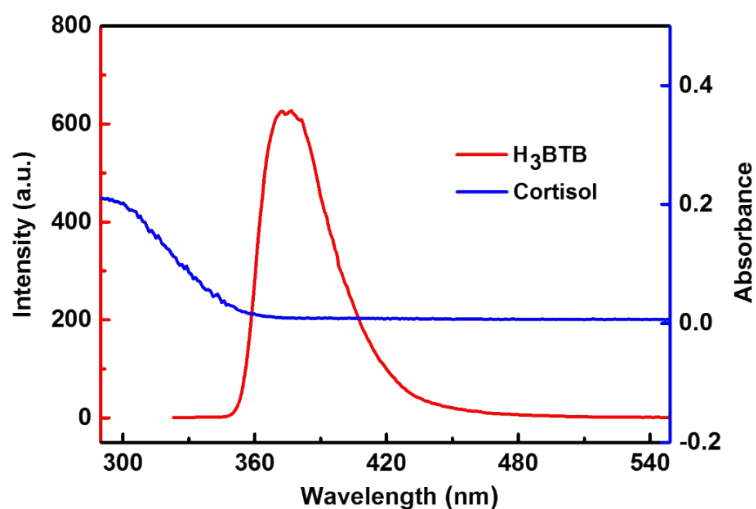

**Fig. S18.** Luminescence emission spectrum of H<sub>3</sub>BTB and UV-Vis absorption of cortisol, respectively.

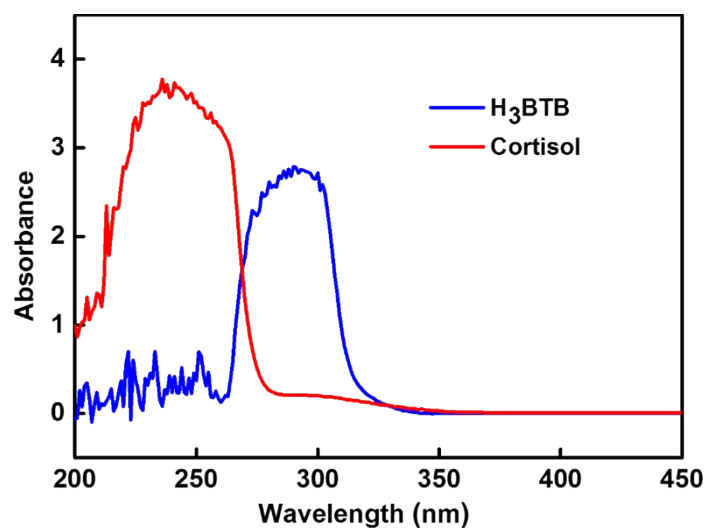

**Fig. S19.** UV-Vis spectra of cortisol and H<sub>3</sub>BTB.

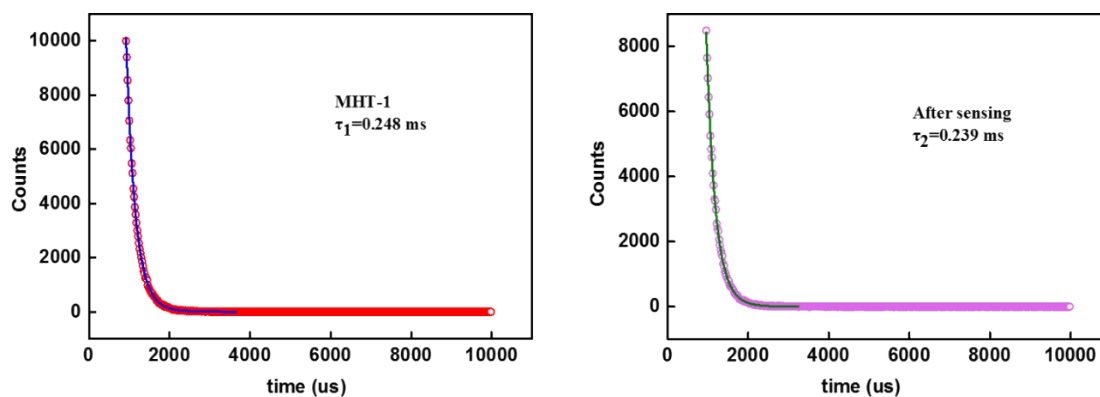

**Fig. S20.** Luminescence lifetime of **MHT-1** before and after sensing cortisol.

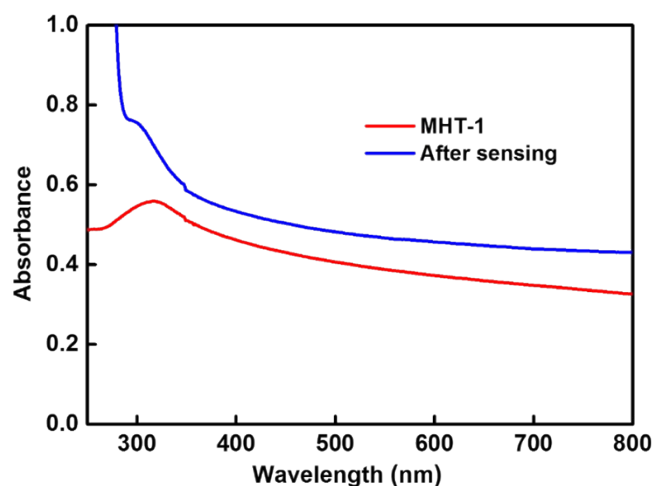

**Fig. S21.** Change of UV-Vis absorption of **MHT-1** after the addition of cortisol.

**Table S1.** Crystal data and structure refinement for **MHT-1**.

| Identification code                     | <b>MHT-1</b>                      |
|-----------------------------------------|-----------------------------------|
| Formula sum                             | $C_{33}H_{44.5}EuN_{1.5}O_{15.5}$ |
| Formula weight                          | 862.18                            |
| Temperature/K                           | 123 (2)                           |
| Crystal system                          | orthorhombic                      |
| Space group                             | Pbca                              |
| a/Å                                     | 26.9686(10)                       |
| b/Å                                     | 7.3840(4)                         |
| c/Å                                     | 34.6549(13)                       |
| $\alpha/^\circ$                         | 90                                |
| $\beta/^\circ$                          | 90                                |
| $\gamma/^\circ$                         | 90                                |
| Volume/Å <sup>3</sup>                   | 6901.0(5)                         |
| Z                                       | 8                                 |
| F(000)                                  | 3520.0                            |
| Goodness-of-fit on F2                   | 1.067                             |
| Final R indexes [ $I \geq 2\sigma(I)$ ] | $R_1 = 0.0531$ , $wR_2 = 0.1050$  |
| Final R indexes [all data]              | $R_1 = 0.0672$ , $wR_2 = 0.1100$  |

**Table S2.** List of Ln-MOFs with interpenetrated structures.

| Compounds                                                                                                                                     | Interpenetration | Reference        |
|-----------------------------------------------------------------------------------------------------------------------------------------------|------------------|------------------|
| $(\text{Me}_2\text{NH}_2)[\text{Ln}(\text{HL}^1)_2(\text{H}_2\text{O})_2] \cdot 1.5\text{H}_2\text{O} \cdot \text{DMF}$ (Ln = Ce, Pr, Nd, Sm) | 8                | 1                |
| <b>MHT-1</b>                                                                                                                                  | <b>4</b>         | <b>This work</b> |
| $[\text{Ce}_4(\text{BINDI})_2(\text{DMA})_{16}] \cdot [\text{SiW}_{12}\text{O}_{40}] \cdot 3\text{DMA}$                                       | 4                | 2                |
| $[\text{Ln}(\text{HL}^2)(\text{DMA})_2] \cdot \text{DMA} \cdot 2\text{H}_2\text{O}$ (Ln = La, Ce, Pr, Nd, Sm, Eu, Gd, Tb, Dy, Er)             | 3                | 3                |
| Gd-pDBI                                                                                                                                       | 3                | 4                |
| $\{(\text{Me}_2\text{NH}_2)[\text{Tb}(\text{OBA})_2] \cdot (\text{Hatz}) \cdot (\text{H}_2\text{O})_{1.5}\}_n$                                | 3                | 5                |
| $\text{Tb}_2(\text{ADB})_3[(\text{CH}_3)_2\text{SO}]_4 \cdot 16[(\text{CH}_3)_2\text{SO}]$                                                    | 2                | 6                |
| $[\text{Eu}(\text{OH})(\text{mip})]_n$                                                                                                        | 2                | 7                |
| $[\text{Me}_2\text{NH}_2]_{24}[\text{Tb}_{12}(\text{TATB})_{16}(\text{HCOO})_{12}] \cdot 12\text{DMF} \cdot 48\text{H}_2\text{O}$             | 2                | 8                |
| Ln-IAM-4                                                                                                                                      | 2                | 9                |
| $\text{Ln}(\text{BDC})_{1.5}(\text{DMF})(\text{H}_2\text{O})$ (Ln = Er, Tm)                                                                   | 2                | 10               |

$\text{H}_3\text{L}^1$  = tris((4-carboxyl)phenylduryl)amine, BINDI = N,N'-bis(5-isophthalate)-1,4,5,8-naphthalenediimide, DMA = N,N-dimethylacetamide,  $\text{H}_4\text{L}^2$  = 5,5'-(2,3,5,6-tetramethyl-1,4-phenylene)bis(methylene)bis(azanediy)diisophthalic acid, pDBI = (1,4-bis(5-carboxy-1H-benzimidazole-2-yl)benzene, OBA = 4,4'-oxybis(benzoate), Hatz = 3-amino-1,2,4-triazole, ADB = 4,4'-azodibenzoate, mip = 5-methylisophthalate ion,  $\text{H}_3\text{TATB}$  = 4,4',4''-s-triazine-2,4,6-tribenzoic acid, IAM = Institute of Advanced Materials,  $\text{H}_2\text{BDC}$  = 1,4-benzenedicarboxylic acid.

**Table S3.** A comparison of sensing rang and limit of detection (LOD) of cortisol in sweat with other reported methods.

|                             | Method used     | Concentration range          | LOD               | Reference        |
|-----------------------------|-----------------|------------------------------|-------------------|------------------|
| -                           | HPLC-MS/MS      | 0.1-25 ng/ml                 | 0.04 ng/ml        | 11               |
| nanoporous polyamide        | ELISA           | 1-100 ng/ml                  | 1 ng/ml           | 12               |
| monooxygenase               | FIA             | 0.98-10 µg/ml                | 0.98 µg/ml        | 13               |
| aptamer                     | LFA             | 10-100 ng/ml                 | 1 ng/ml           | 14               |
| UV-LED                      | UV spectroscopy | 0.5-5 µg/ml                  | 0.2 µg/mL         | 15               |
| TMB(Red)                    | CE-EIA-ED       | 0-60 ng/ml                   | 0.6 ng/ml         | 16               |
| β-MnO <sub>2</sub> CNs      | EIS             | 0.03-54 pg/ml                | 0.008 pg/ml       | 17               |
| MoS <sub>2</sub> nanosheets | EIS             | 1-500 ng/ml                  | 1 ng/ml           | 18               |
| e-RGO                       | ED              | 0.1-200 ng/ml                | 0.1 ng/ml         | 19               |
| MIPs                        | ED              | 10-66 ng/ml                  | 2.0 ng/ml         | 20               |
| LTCC                        | ED              | 0.04-36 ng/ml                | 0.01 ng/ml        | 21               |
| RTILs                       | ED              | 0.1-200ng/ml                 | 0.1 ng/mL         | 22               |
| FET                         | ED              | 10 fg/ml-10 ng/ml            | 1 pg/ml           | 23               |
| ZnONRs/CCY                  | ED              | 1 fg/ml-1 µg/ml              | 0.098 fg/ml       | 24               |
| EDL                         | ED              | 10-200 ng/ml                 | 1 ng/ml           | 25               |
| <b>MHT-1</b>                | <b>LD</b>       | <b>0.36 ng/ml-1450 µg/ml</b> | <b>0.36 ng/ml</b> | <b>This work</b> |

ELISA = enzyme-linked immunosorbent assay, FIA = fluorimetric assay, LFA = lateral flow assay, UV-LED = UV light emitting diode, CE-EIA-ED = capillary electrophoretic enzyme immunoassay with electrochemical detection, e-RGO = electroreduced graphene oxide, EIS = electrochemical impedance spectroscopy, ED = electrochemical detection, MIPs = molecular imprinted polymers, LTCC = low temperature co-fired ceramic, RTILs = room temperature ionic liquids, FET = field-

effect transistor, ZnONRs/CCY = ZnO nanorods - coated flexible carbon yarns, EDL = electrical double layer, LD = luminescent detection.

**Table S4.** The truth table of Gate 1, Gate 2 and Gate 3.

|               |                 |                          |                 |
|---------------|-----------------|--------------------------|-----------------|
| <b>Gate 1</b> | <b>Input 1A</b> |                          | <b>Output 1</b> |
|               | C > 8 ng/ml     |                          | Light 1         |
|               | 0               |                          | 1               |
|               | 1               |                          | 0               |
| <b>Gate 2</b> | <b>Input 2</b>  |                          | <b>Output 2</b> |
|               | Output 1        | Input 1B (C > 140 ng/ml) | Light 2         |
|               | 0               | 1                        | 0               |
|               | 0               | 0                        | 1               |
| <b>Gate3</b>  | <b>Input 3</b>  |                          | <b>Output 3</b> |
|               | Output 2        |                          | Light 3         |
|               | 0               |                          | 1               |
|               | 1               |                          | 0               |

#### References

- 1 Y. P. He, Y. X. Tan and J. Zhang, *Inorg. Chem.*, 2013, **52**, 12758–12762.
- 2 H. L. Zhang, J. Z. Liao, W. Yang, X. Y. Wu and C. Z. Lu, *Dalt. Trans.*, 2017, **46**, 4898–4901.
- 3 C. Wang, L. Li, J. G. Bell, X. Lv, S. Tang, X. Zhao and K. M. Thomas, *Chem. Mater.*, 2015, **27**, 1502–1516.
- 4 T. Kundu, S. Mitra, P. Patra, A. Goswami, D. Díazdiaz and R. Banerjee, *Chem. - A Eur. J.*, 2014, **20**, 10514–10518.
- 5 D. M. Chen, N. N. Zhang, C. S. Liu and M. Du, *J. Mater. Chem. C*, 2017, **5**, 2311–2317.

- 6 T. M. Reineke, M. Eddaoudi, D. Moler, M. O’Keeffe and O. M. Yaghi, *J. Am. Chem. Soc.*, 2000, **122**, 4843–4844.
- 7 Q. B. Bo, H. T. Zhang, H. Y. Wang, J. L. Miao and Z. W. Zhang, *Chem. - A Eur. J.*, 2014, **20**, 3712–3723.
- 8 Y. H. Han, C. B. Tian, P. Lin and S. W. Du, *J. Mater. Chem. A*, 2015, **3**, 24525–24531.
- 9 Z. Duan, Y. Li, X. Xiao, X. Huang, X. Li, Y. Li, C. Zhang, H. Zhang, L. Li, Z. Lin, Y. Zhao and W. Huang, *ACS Appl. Mater. Interfaces*, 2020, **12**, 18715–18722.
- 10 H. He, D. Yuan, H. Ma, D. Sun, G. Zhang and H. C. Zhou, *Inorg. Chem.*, 2010, **49**, 7605–7607.
- 11 M. Jia, W. M. Chew, Y. Feinstein, P. Skeath and E. M. Sternberg, *Analyst*, 2016, **141**, 2053–2060.
- 12 S. Upasham and S. Prasad, *Lab Chip*, 2020, **20**, 1947–1960.
- 13 D. Appel, R. D. Schmid, C. A. Dragan, M. Bureik and V. B. Urlacher, *Anal. Bioanal. Chem.*, 2005, **383**, 182–186.
- 14 S. Dalirirad and A. J. Steckl, *Sensors Actuators, B Chem.*, 2019, **283**, 79–86.
- 15 P. Ray and A. J. Steckl, *ACS Sensors*, 2019, **4**, 1346–1357.
- 16 M. Jia, Z. He, W. Jin, *J. Chromatogr. A*, 2002, **966**, 187–194.
- 17 Q. Zhou, P. Kannan, B. Natarajan, T. Maiyalagan, P. Subramanian, Z. Jiang, S. Mao, *Sensors Actuators, B Chem.*, 2020, **317**, 128134.
- 18 D. Kinnamon, R. Ghanta, K. C. Lin, S. Muthukumar, S. Prasad, *Sci. Rep.*, 2017, **7**, 1–13.
- 19 S. K. Tuteja, C. Ormsby, S. Neethirajan, *Nano-Micro Lett.*, 2018, **10**, 1–10.
- 20 S. M. Mugo and J. Alberkant, *Anal. Bioanal. Chem.*, 2020, **412**, 1825–1833.
- 21 A. Vasudev, A. Kaushik, Y. Tomizawa, N. Norena and S. Bhansali, *Sensors Actuators, B Chem.*, 2013, **182**, 139–146.
- 22 B. Jagannath, S. Muthukumar, S. Prasad, *Anal. Chim. Acta*, 2018, **1016**, 29–39.
- 23 H. J. Jang, T. Lee, J. Song, L. Russell, H. Li, J. Dailey, P. C. Searson and H. E. Katz, *ACS Appl. Mater. Interfaces*, 2018, **10**, 16233–16237.
- 24 S. Madhu, A. J. Anthuvan, S. Ramasamy, P. Manickam, S. Bhansali, P.

- Nagamony and V. Chinnuswamy, *ACS Appl. Electron. Mater.*, 2020, **2**, 499–509.
- 25 R. D. Munje, S. Muthukumar, A. Panneer Selvam and S. Prasad, *Sci. Rep.*, 2015, **5**, 1–11.
